# Supplementary material for: High Cognitive Ability and Mental Health: Findings from a Large Community Sample of Adolescents
Source: MDPI journal article supplement (doi:10.3390/jintelligence11020038), 2023-02-18
Supplement: s1 [file s1]

**Table S1.** Measurement invariance of mental health indicators between high ability and average ability adolescents, with the average ability group restricted to IQ between 98 and 102, balancing sample sizes between groups. Difference values in bold indicate that the observed changes in model fit supported measurement invariance (decrease in CFI  $\leq 0.010$ ; increase in RMSEA  $\leq 0.010$ ; increase in SRMR  $\leq 0.025$  (metric invariance) or  $\leq 0.005$  (scalar invariance)).

|                            | Model A:<br>Free loadings and<br>intercepts | Model B:<br>Loadings<br>constrained to be<br>equal across<br>groups |               | Model C:<br>Loadings and<br>intercepts<br>constrained to be<br>equal across groups |               |
|----------------------------|---------------------------------------------|---------------------------------------------------------------------|---------------|------------------------------------------------------------------------------------|---------------|
|                            | Value                                       | Value                                                               | Diff. B-A     | Value                                                                              | Diff. C-B     |
| <i>Student self-report</i> |                                             |                                                                     |               |                                                                                    |               |
| Global Self-Esteem         |                                             |                                                                     |               |                                                                                    |               |
| CFI                        | 0.930                                       | <b>0.931</b>                                                        | <b>0.001</b>  | <b>0.925</b>                                                                       | <b>-0.006</b> |
| RMSEA                      | 0.170                                       | <b>0.138</b>                                                        | <b>-0.032</b> | <b>0.127</b>                                                                       | <b>-0.011</b> |
| SRMR                       | 0.058                                       | <b>0.068</b>                                                        | <b>0.010</b>  | 0.083                                                                              | 0.015         |
| Emotional Problems         |                                             |                                                                     |               |                                                                                    |               |
| CFI                        | 0.965                                       | <b>0.969</b>                                                        | <b>0.004</b>  | 0.957                                                                              | -0.012        |
| RMSEA                      | 0.082                                       | <b>0.063</b>                                                        | <b>-0.019</b> | <b>0.066</b>                                                                       | <b>0.003</b>  |
| SRMR                       | 0.034                                       | <b>0.037</b>                                                        | <b>0.003</b>  | <b>0.042</b>                                                                       | <b>0.005</b>  |
| Worry                      |                                             |                                                                     |               |                                                                                    |               |
| CFI                        | 0.948                                       | <b>0.948</b>                                                        | <b>-0.000</b> | <b>0.947</b>                                                                       | <b>-0.001</b> |
| RMSEA                      | 0.171                                       | <b>0.142</b>                                                        | <b>-0.029</b> | <b>0.131</b>                                                                       | <b>-0.011</b> |
| SRMR                       | 0.040                                       | <b>0.047</b>                                                        | <b>0.007</b>  | <b>0.050</b>                                                                       | <b>0.003</b>  |
| Conduct Problems           |                                             |                                                                     |               |                                                                                    |               |
| CFI                        | 0.991                                       | 0.979                                                               | -0.012        | 0.910                                                                              | -0.069        |
| RMSEA                      | 0.028                                       | <b>0.034</b>                                                        | <b>0.006</b>  | 0.060                                                                              | 0.026         |
| SRMR                       | 0.023                                       | <b>0.034</b>                                                        | <b>0.011</b>  | 0.062                                                                              | 0.028         |
| Hyperactivity/Inattention  |                                             |                                                                     |               |                                                                                    |               |
| CFI                        | 0.892                                       | <b>0.895</b>                                                        | <b>0.003</b>  | 0.862                                                                              | -0.033        |
| RMSEA                      | 0.128                                       | <b>0.105</b>                                                        | <b>-0.023</b> | <b>0.110</b>                                                                       | <b>0.005</b>  |
| SRMR                       | 0.053                                       | <b>0.055</b>                                                        | <b>0.002</b>  | 0.070                                                                              | 0.015         |
| <i>Parent report</i>       |                                             |                                                                     |               |                                                                                    |               |
| Emotional Problems         |                                             |                                                                     |               |                                                                                    |               |
| CFI                        | 0.979                                       | <b>0.982</b>                                                        | <b>0.003</b>  | 0.956                                                                              | -0.026        |
| RMSEA                      | 0.076                                       | <b>0.056</b>                                                        | <b>-0.02</b>  | 0.074                                                                              | 0.018         |
| SRMR                       | 0.026                                       | <b>0.032</b>                                                        | <b>0.006</b>  | 0.042                                                                              | 0.010         |
| Conduct Problems           |                                             |                                                                     |               |                                                                                    |               |
| CFI                        | 0.964                                       | 0.929                                                               | -0.035        | 0.885                                                                              | -0.044        |
| RMSEA                      | 0.047                                       | <b>0.050</b>                                                        | <b>0.003</b>  | <b>0.055</b>                                                                       | <b>0.005</b>  |
| SRMR                       | 0.028                                       | <b>0.043</b>                                                        | <b>0.015</b>  | 0.059                                                                              | 0.016         |
| Hyperactivity/Inattention  |                                             |                                                                     |               |                                                                                    |               |
| CFI                        | 0.775                                       | <b>0.778</b>                                                        | <b>0.003</b>  | 0.734                                                                              | -0.044        |
| RMSEA                      | 0.288                                       | <b>0.229</b>                                                        | <b>-0.059</b> | <b>0.215</b>                                                                       | <b>-0.014</b> |
| SRMR                       | 0.086                                       | <b>0.087</b>                                                        | <b>0.001</b>  | 0.131                                                                              | 0.044         |
